# Allosteric Inhibition of CRISPR-Cas9 by Bacteriophage-derived Peptides

Yan-ru Cui<sup>1,4,5</sup>, Shao-jie Wang<sup>1,5</sup>, Jun Chen<sup>2</sup>, Jie Li<sup>1,4</sup>, Wenzhang Chen<sup>1</sup>, Shuyue Wang<sup>1</sup>,  
Bing Meng<sup>1</sup>, Wei Zhu<sup>1</sup>, Zhuhong Zhang<sup>3</sup>, Bei Yang<sup>1</sup>, Biao Jiang<sup>1</sup>, Guang Yang<sup>1</sup>,  
Peixiang Ma<sup>1,\*</sup>, Jia Liu<sup>1\*</sup>

<sup>1</sup>Shanghai Institute for Advanced Immunochemical Studies, ShanghaiTech University,  
Shanghai, 201210, China.

<sup>2</sup>College of Life Sciences, Zhejiang University, Hangzhou, Zhejiang, 310058, China.

<sup>3</sup>School of Pharmacy, Key Laboratory of Molecular Pharmacology and Drug  
Evaluation (Yantai University), Ministry of Education, Collaborative Innovation Center  
of Advanced Drug Delivery System and Biotech Drugs in Universities of Shandong,  
Yantai University, 264005, Yantai, Shandong, People's Republic of China.

<sup>4</sup>University of Chinese Academy of Sciences, Beijing, China.

<sup>5</sup> These authors contributed equally to this work.

\*Correspondence should be addressed to: J. Liu ([liujia@shanghaitech.edu.cn](mailto:liujia@shanghaitech.edu.cn)) and P.

Ma ([mapx@shanghaitech.edu.cn](mailto:mapx@shanghaitech.edu.cn))

## Abstract

**Background** CRISPR-Cas9 has been developed as a therapeutic agent for various infectious and genetic diseases. In many clinically relevant applications, constitutively active CRISPR-Cas9 is delivered into human cells without a temporal control system. Excessive and prolonged expression CRISPR-Cas9 can lead to elevated off-target cleavage. The need for modulating CRISPR-Cas9 activity over the dimensions of time and dose has created the demand of developing CRISPR-Cas off-switches. Protein and small molecule-based CRISPR-Cas inhibitors have been reported in previous studies.

**Results** We report the discovery of Cas9-inhibiting peptides from inoviridae bacteriophages. These peptides, derived from the periplasmic domain of phage major coat protein G8P (G8P<sub>PD</sub>), can inhibit the *in vitro* activity of *Streptococcus pyogenes* Cas9 (SpyCas9) proteins in an allosteric manner. Ectopic expression of full-length G8P (G8P<sub>FL</sub>) or G8P<sub>PD</sub> in human cells can inactivate the genome-editing activity of SpyCas9 with minimum alterations of the mutation patterns. Furthermore, unlike the anti-CRISPR protein AcrII4A that completely abolishes the cellular activity of CRISPR-Cas9, G8P co-transfection can reduce the off-target activity of co-transfected SpyCas9 while retaining its on-target activity.

**Conclusion** G8Ps discovered in the current study represent the first anti-CRISPR peptides that can allosterically inactivate CRISPR-Cas9. This finding may provide insights into developing next-generation CRISPR-Cas inhibitors for precision genome engineering.

**Keywords** CRISPR-Cas9, inoviridae bacteriophage, major coat protein G8P, allosteric

inhibition, off-target activity

## Background

Clustered Regularly-Interspaced Short Palindromic Repeats (CRISPR) is the bacterial adaptive immune system to defend bacteriophage infections [1-3]. During infection, invader DNA is captured and integrated into bacterial genome as CRISPR array. Sequences from CRISPR array are transcribed and processed into CRISPR RNAs (crRNAs), which direct CRISPR-associated (Cas) proteins to foreign nucleic acids [1, 2]. Type II CRISPR-Cas systems function with streamlined components comprising of a single nuclease protein such as Cas9 [4]. The modular and programmable features make CRISPR-Cas9 one of the most widely used tools for genome engineering applications [5-8]. However, CRISPR-Cas9 is associated with off-target cleavage [9], chromosomal rearrangement [10] and genotoxicity [11]. These side effects mainly arise from the excessive or prolonged expression of CRISPR-Cas9 [12-14]. As a therapeutic agent, CRISPR-Cas9 is often constitutively expressed in host cells [15], making the elevated off-activity a major safety concern. Temporal control of SpyCas9 activity have been investigated as an approach to improving its specificity in human cells. Technologies enabling the temporal control of CRISPR-Cas9 include optogenetic tools, intein splicing system, small molecule inducers or inhibitors [16-20] and anti-CRISPR proteins (Acrs) [21, 22].

The most investigated CRISPR-Cas inhibitors are the naturally occurring, phage-derived Acrs. Bacteriophages can use Acrs to antagonize the CRISPR-Cas immunity in bacteria [23, 24]. A number of Acrs have been identified for type I [23, 25-28], type II [29-32] and type V [28, 33] CRISPR-Cas systems. Acrs can be adapted to regulate

CRISPR-Cas activities in bacteria [34], yeast [35] and mammalian cells [29, 31, 34, 36-38]. Biosensor [39] and synthetic circuits [40] can be devised based on Acr-coupled CRISPR-Cas systems. Moreover, Acrs can be harnessed to enable the temperature-responsive [41] and optogenetic [42] control of CRISPR-Cas activity. Importantly, Acrs can enhance the editing [38] and cell-type [43] specificities and reduce the cytotoxicity [11] of CRISPR-Cas-mediated genome editing. It has also been reported that Acrs can facilitate the production of CRISPR-carrying viral vectors by restricting CRISPR self-cleavage [44].

Currently known Acrs inhibit CRISPR-Cas systems by interfering with Cas protein-mediated DNA surveillance or cleavage [21]. For instance, AcrIIA4 mimics double-stranded DNA (dsDNA) and occupies the protospacer adjacent motif (PAM) recognition site of SpyCas9, thereby preventing Cas9 protein from binding to the target DNA [38, 45, 46]. Using a different mechanism, AcrIIC3 perturbs DNA binding by inducing the dimerization of Cas9 protein [36]. An alternative Cas inactivation strategy by Acrs is to interact with DNA-bound Cas proteins and block subsequent DNA cleavage, as seen with AcrF3 [47, 48] and AcrIIC1 [36]. In addition, some Acrs can function as acetyltransferase and inactivate CRISPR-Cas activity by post-translational modifications [49]. Different Acrs may inactivate CRISPR-Cas via identical mechanisms while possessing low sequence similarities [21]. The Acrs characterized to date share no common sequence motifs except for a putative transcriptional element referred to as anti-CRISPR associated genes (Acas) that are commonly found downstream of the Acr genes in the bacteriophage genome [26]. The poorly understood

sequence-structure-activity relationship largely hampers the systemic discovery of novel Acrs. In addition to protein-based inhibitors, small-molecule CRISPR-Cas inhibitors have been developed. However, relative high concentrations of 10  $\mu$ M or above are required for small molecules to achieve efficient inhibition.

Along with small molecules and proteins, peptides represent an alternative class of CRISPR-inhibiting agents with distinct biochemical features. In this study, we report the discovery of Cas9-inactivating peptides from inoviridae bacteriophages. In an attempt to develop anti-CRISPR antibodies using well established phage display technology, we are surprised to find that the commonly used laboratory bacteriophage strain M13 served as a source of Cas9-inactivating agent. Subsequent analyses showed that the periplasmic domain of the major coat protein G8P (G8P<sub>PD</sub>) from several inoviridae bacteriophages, which contain M13 phage, inhibited the *in vitro* and *in vivo* activity of SpyCas9 in an allosteric manner. Our study hence expands the inhibitor toolbox for the temporal control of CRISPR-Cas activity.

## Results

### **Intact M13 phage inhibits the *in vitro* DNA cleavage activity of SpyCas9**

In a conventional phage display experiment, we surprisingly discovered that intact M13 phage [50] itself could block the DNA cleavage activity of purified SpyCas9 proteins in dose-dependent manner with an approximate half maximum inhibitory concentration (IC<sub>50</sub>) of 5 nM (Fig. 1a), which corresponds to a phage titer of  $3 \times 10^9$  PFU/ $\mu$ L. Interestingly, phage-mediated SpyCas9 inactivation occurred only if phage was supplemented to the reaction prior to the addition of sgRNA, but not post the formation of SpyCas9-sgRNA ribonucleoproteins (RNPs) (Fig. 1b). The order-of-addition-dependent inhibition suggested that competition for sgRNA-binding site in SpyCas9 is a possible mechanism of the inhibitory activity of M13 phage.

### **M13 phage major coat protein-derived peptide inhibits the *in vitro* DNA cleavage activity of SpyCas9**

Next we sought to determine the components in M13 phage that contribute to SpyCas9 inactivation. M13 phage has a simple, compact genome comprising of 11 protein-coding sequences. Considering the accessibility, surface-exposed phage proteins most likely serve as the sources of Cas9-inhibiting agents. Fully packaged M13 phage contains approximately 2700 copies of major coat protein pVIII (G8P) and 5 copies each of minor coat proteins pIII, pVI, pVII and pXI [51-53]. We initiated our investigation on the major coat protein G8P due to its abundance on M13 phage surface. The 73-amino acid major coat protein G8P contains four segments including signal

peptide, periplasmic domain, transmembrane helix and cytoplasmic domain (Fig. 1c).

After G8P maturation, signal peptide is cleaved and transmembrane helix is inserted into phage membrane, leaving periplasmic domain the only region on phage surface.

Therefore, we synthesized a 21-amino acid peptide constituting the periplasmic domain of G8P (G8P<sub>PD</sub>) and examined its inhibitory activity on SpyCas9.

We found that G8P<sub>PD</sub> inhibited the activity of SpyCas9 with an IC<sub>50</sub> of 5  $\mu$ M (Fig. 1d), which was 1000-fold lower than that of intact M13 phage. Similar to the intact phage, G8P<sub>PD</sub> suppressed the *in vitro* DNA cleavage of SpyCas9 in an order-of-addition-dependent manner (Fig. 1e), indicating that G8P<sub>PD</sub> may inactivate SpyCas9 by specifically interfering with apo-SpyCas9.

In an effort to Blast search peptide homologs of M13 G8P<sub>PD</sub>, we identified G8P<sub>PD</sub> from f1 phage which has only one amino acid difference from M13 G8P<sub>PD</sub> (Additional file 1: Figure S1a). Because M13 and f1 G8P<sub>PD</sub> peptides have similar amino acid sequences and Cas9-inhibiting activities (Additional file 1: Figure S1b), they were used interchangeably in the following studies.

### **G8P<sub>PD</sub> prevents the assembly of Cas9 and sgRNA by binding to apo-Cas9**

SpyCas9 can be inactivated at distinct steps during its action including guide RNA binding, substrate DNA binding and DNA cleavage. Most previously known Acrs exert their inhibitory activity by interfering with DNA surveillance or cleavage. To understand the mechanism of actions of G8P<sub>PD</sub>, we examined the interactions between G8P<sub>PD</sub> and apo-Cas9 or Cas9-sgRNA RNP using electrophoresis mobility shift assay



(EMSA). Under fixed sgRNA concentration of 15  $\mu\text{M}$ , the fraction of Cas9-bound sgRNA increased with the increasing molar ratio of Cas9 and sgRNA in the absence of G8P<sub>PD</sub>. By contrast, pre-incubation of SpyCas9 proteins with 300  $\mu\text{M}$  G8P<sub>PD</sub> reduced the fraction of Cas9-bound sgRNA in a G8P<sub>PD</sub> dose-dependent manner (Fig. 2a). We also noticed that under high molar ratio of Cas9 and sgRNA, G8P<sub>PD</sub> did not fully block the formation of Cas9-sgRNA RNP (Fig. 2a), suggesting a weak interaction between Cas9 and G8P<sub>PD</sub>.

G8P<sub>PD</sub>-mediated inhibition of Cas9-sgRNA assembly is dependent on the order of sgRNA addition. Under a fixed Cas9-sgRNA molar ratio of 0.3, pre-incubation of Cas9 with 300 or 600  $\mu\text{M}$  f1 G8P<sub>PD</sub> prior to sgRNA addition abolished the assembly of Cas9 and sgRNA (Fig. 2b). By contrast, supplementation of 300 or 600  $\mu\text{M}$  G8P<sub>PD</sub> post sgRNA addition had minor or no effect on the formation of Cas9-sgRNA complex (Fig. 2b). These results suggest that G8P<sub>PD</sub> prevents Cas9-sgRNA binding by interacting with apo-Cas9 but not sgRNA-bound Cas9 and may explain why G8P<sub>PD</sub>-mediated inactivation of SpyCas9 cleavage is dependent on the order of sgRNA addition.

### **Identification of G8P<sub>PD</sub> binding site in SpyCas9**

In order to dissect the mechanism of interactions between SpyCas9 and G8P<sub>PD</sub>, we sought to determine the binding region of G8P<sub>PD</sub> on SpyCas9 using high-resolution mass spectrometry (MS). SpyCas9 protein and M13 G8P<sub>PD</sub> were crosslinked using collision-induced dissociation (CID)-cleavable cross-linker disuccinimido sulfoxide (DSSO) [54] and then were subject to digestion with chymotrypsin. The integration

analyses of CID-induced cleavage of interlinked peptides in MS/MS and MS<sup>3</sup> of single peptide chain fragment ions revealed high crosslinking scores (Fig. 3a) on residues K1158 of [K]SVKEL peptide and K1176 of E[K]NPIDFLEAKGY peptide from SpyCas9 (Fig. 3b-c and Additional file 1: Figure S2a-b). These peptides occupy a continuous region in the PAM-interacting (PI) domain of SpyCas9 (Fig. 3d) that is responsible for recognizing the PAM sequence on the non-complementary DNA strand [55]. Interestingly, this candidate G8P<sub>PD</sub> binding site does not locate in the sgRNA or DNA binding pockets of SpyCas9. These results suggest that G8P<sub>PD</sub> does not directly compete with sgRNA but may instead function as an allosteric inhibitor.

Next we sought to perform mutational analyses on the candidate G8P<sub>PD</sub> binding sites in SpyCas9. Residues KSKVEL in K1158 mutant and EKNPID in K1176 mutant were mutated into alanines respectively. Mutant SpyCas9 proteins were purified into high homogeneity (Additional file 1: Figure S3a-b). *In vitro* cleavage reaction illustrated that alanine mutations at positions KSKVEL (K1158 mutant) and EKNPID (K1176 mutant) markedly reduced the DNA cleavage activity of SpyCas9 (Fig. 3e), suggesting the importance of the G8P<sub>PD</sub> binding sites for SpyCas9 activity.

### **$\alpha$ -helical structure is critical for the inhibitory activity of G8P<sub>PD</sub>**

Next we performed an alanine scan on f1 phage G8P<sub>PD</sub> to illustrate its structural determinants for Cas9 inhibition. Four peptide mutants are designed with alanine mutations spanning the entire G8P<sub>PD</sub> sequence (Fig. 4a). Alanine mutations at positions 6 to 11 abolished the inhibitory activity of G8P<sub>PD</sub> while mutants 1, 3 and 4 retained the

majority of Cas9-inhibiting activity (Fig. 4a). The major coat protein G8P adopts an  $\alpha$ -helical structure [53]. Residues 6 to 11 are located at the N-terminus of the  $\alpha$  helix and contain Pro6, Lys8, Phe11 and three native alanines (Fig. 4b). The abolished activity in mutant 2 suggested a critical role of positions 6 to 11, particularly the residues Pro6, Lys8 and Phe11. Circular dichroism (CD) spectra study revealed an  $\alpha$ -helical structure-enriched feature for f1 G8P<sub>PD</sub> WT but not for mutant 2 (Fig. 4c), suggesting that Pro6, Lys8 and Phe11 are important for maintaining the  $\alpha$ -helical structure in f1 G8P<sub>PD</sub>. Although the presence of residues 6 to 11 could directly participate in the interaction between Cas9 and G8P<sub>PD</sub>, the overall  $\alpha$ -helical structure of G8P<sub>PD</sub> could be also important for its Cas9-inhibiting activity.

### **Modulation of SpyCas9 activity in human cells using inoviradae phage G8P<sub>PD</sub>**

We next explored the potential application of G8P<sub>PD</sub> as an off-switch for the genome-editing activity of SpyCas9 in human cells. Ectopic expression of the full-length (G8P<sub>FL</sub>) or periplasmic domain (G8P<sub>PD</sub>) of M13 and f1 G8P at 24 h prior to Cas9-sgRNA transfection significantly suppressed the genome-editing activity of SpyCas9 in HEK293 cells (Fig. 5a). In comparison, Acr protein AcrII4A [38] blocked SpyCas9 cleavage on *AAVS1* site whereas *Neisseria meningitidis* Cas9 (NmeCas9)-specific Acr protein AcrIIC3 [56] partially inhibited SpyCas9. Importantly, f1 G8P<sub>PD</sub> was capable to inhibit SpyCas9 activity across different genes and cell types (Fig. 5b). Consistent with the *in vitro* experiments, significant inhibition of the on-target activity of SpyCas9 in human cells was observed only when G8P<sub>PD</sub> was overexpressed prior to sgRNA

transfection. Co-transfection of G8P<sub>PD</sub> and SpyCas9-sgRNA did not inhibit SpyCas9 cleavage ( $P>0.05$ ) (Fig. 5c).

In order to have detailed understanding of the effects of G8P<sub>PD</sub> on the genome-editing activity of SpyCas9, we performed next-generation sequencing to analyze the profiles of edited genomic loci in the absence and presence of G8P<sub>PD</sub>. Despite reduced mutation rate, the mutation pattern of SpyCas9 along the 20 bp sgRNA-targeting site was not altered by G8P<sub>PD</sub> treatment, as characterized by the high-frequency editing events at 3 bp upstream of the PAM sequence [4] (Fig. 5d). Importantly, G8P<sub>PD</sub> treatment retained the distribution pattern of indel length, with 1-5 bp indel being predominant in the population (Additional file 1: Figure S4a). In addition, we observed modest decrease in the in-frame mutations (3N) (Additional file: Figure S4b), the mechanism of which is yet to be elucidated. Collectively, these data suggested that G8P<sub>PD</sub> treatment did not cause major alterations in the profiles of SpyCas9-induced mutations, thus highlighting the potential of G8P<sub>PD</sub> as a safe off-switch for the therapeutic applications of SpyCas9.

To expand peptide-based anti-CRISPR toolbox, we examined the G8Ps from other inoviridae phages (Additional file 1: Figure S5). Peptides constituting the periplasmic domain of these G8P (G8P<sub>PD</sub>) are synthesized and evaluated for the *in vitro* and *in vivo* activities. At a concentration of 100  $\mu$ M, the G8P<sub>PD</sub> from M13, f1, Pf1 and I2-2 phage markedly inhibited the *in vitro* DNA cleavage activity of SpyCas9 while other G8P<sub>PD</sub> orthologs showed little inhibitory effects (Fig. 5e). Ectopic expression of M13, f1 and pf1 G8P<sub>PD</sub> in K562 cells significantly reduced the activity of SpyCas9 in HEK293 cells

whereas G8P<sub>PD</sub> mutant 2 did not show inhibitory activity ( $P>0.05$ ) (Fig. 5f). Our results suggested that inoviridae phage G8Ps could be leveraged to inhibit both the *in vitro* and *in vivo* activity of SpyCas9. The variations of G8P<sub>PD</sub> sequences and the difference in their inhibitory activities indicate that further engineering endeavors could be made to improve Cas9-inhibiting peptides.

### **G8P co-transfection improves the specificity of SpyCas9 at AAVSI site in human cells**

It has been reported that timed delivery of AcrIIA4 can improve the genome-editing specificity of nucleofected Cas9-sgRNA RNP complex [38]. We intended to investigate the effects of G8P peptides on the specificity of constitutively expressed SpyCas9, a more therapeutically relevant model. The aforementioned *in vitro* and *in vivo* data have suggested that the inhibitory effects of G8P on CRISPR-Cas9 is dependent on the accessibility of Cas9 protein to sgRNA. This observation prompted us to explore whether G8P can be leveraged, via timed delivery, to improve the specificity of SpyCas9. Unlike the above experiments using G8Ps as CRISPR-Cas9 off switch (Fig. 5), here we co-transfected HeLa cells with Acr or G8P plasmid and sgRNA and SpyCas9-coding plasmids. AcrIIA4 suppressed the on- and off-activities of SpyCas9 to undetectable levels, as determined by T7E1 assay (Fig. 6a). Next-generation sequencing analyses of edited HeLa cells showed that M13 G8P<sub>FL</sub> and f1 G8P<sub>FL</sub> significantly reduced ( $P<0.05$ ) both the on-target and off-target activity of SpyCas9 though the inhibitory effects on the off-target site appeared to be more prominent (Fig.

6b). AcrIIC3 significantly reduced the on-target activity ( $P < 0.05$ ) but not the off-target activity ( $P > 0.05$ ) (Fig. 6b). Importantly, M13 G8P<sub>PD</sub> could reduce the off-target events without affecting the on-target cleavage (Fig. 6a-b). Similarly, M13 G8P<sub>PD</sub> reduced the off-target events of SpyCas9 in K562 cells but retained the on-target activity (Fig. 6c). Co-transfection of M13 G8P<sub>FL</sub> or f1 G8P<sub>FL</sub> in K562 cells led to minimum or no significant decrease of the on-target activity of SpyCas9 but markedly reduced the off-target events (Fig. 6c). Surprisingly, in K562 cells AcrIIC3 had little effect on the on-target activity of SpyCas9 but notably increase the off-target activity (Fig. 6c). Collectively, these data suggest that co-transfection of G8P-based anti-CRISPR agents can reduce the off-target events of constitutively expressed SpyCas9 in human cells with minimum perturbation on the on-target activity (Fig. 6d).

## Discussion

In this study, we reported the discovery of anti-CRISPR peptides from inoviridae bacteriophages. The clue leading to this discovery was based on the observation that intact M13 phage inhibited the DNA cleavage activity of SpyCas9 in *in vitro* reactions. Although we focused the investigation on the major coat protein G8P in the present study, it is likely that other surface-exposed minor coat proteins may attribute to intact phage-mediated SpyCas9 inhibition.

Unlike previously described Acrs that inhibit CRISPR-Cas by disrupting DNA binding [36, 45, 57] or DNA cleavage [36], G8P inactivates CRISPR-Cas9 via a distinct mechanism by preventing Cas9 from sgRNA binding. Moreover, to achieve efficient *in vitro* and *in vivo* inhibition, G8P<sub>PD</sub> must access SpyCas9 prior to its binding with sgRNA, indicating that G8P<sub>PD</sub> binds to apo-Cas9, but not sgRNA-bound Cas9. These results suggest that G8P<sub>PD</sub> and sgRNA are mutually exclusive for binding with Cas9 nuclease. One straightforward explanation is that G8P<sub>PD</sub> and sgRNA compete for the same binding pocket. However, MS and mutational studies suggest that the binding site of f1 G8P<sub>PD</sub> is located on the PI domain of Cas9, distal from sgRNA or DNA binding pockets, thus suggesting against direct competition between G8P<sub>PD</sub> and sgRNA. It is known that the binding of guide RNA can induce conformational rearrangements of Cas9 [58], thus it is possible that upon G8P<sub>PD</sub> or sgRNA binding SpyCas9 can transform from a flexible conformation to a closed conformation, which prevents SpyCas9 from binding with the other counterpart. Collectively, G8P-mediated allosteric inhibition of Cas9 and sgRNA binding represents a unique CRISPR-inactivating mechanism that

may have important implications for developing next-generation anti-CRISPR agents.

Existing Acr proteins can display nanomolar binding affinity to Cas9 [36]. By contrast, inoviridae phage G8P<sub>PD</sub> peptides exhibit weak affinity as evidenced by the micromolar IC<sub>50</sub> in the *in vitro* cleavage reaction (Fig. 1) and by its inability to completely block the assembly of Cas9 and sgRNA (Fig. 2). Interestingly, intact M13 phage inhibits Cas9 with an IC<sub>50</sub> of approximately 5 nM, 1000-fold lower than that with G8P<sub>PD</sub>. The increased potency with intact phage may result from the enhanced cooperativity and avidity afforded by the multimeric assembly of the phage capsid that carries 2700 copies of G8P.

Although we have demonstrated that inoviridae phage G8P<sub>PD</sub> can function as anti-CRISPR peptides, the biological relevance of our discovery is yet to be explored. Under native context, the major coat protein G8P does not enter bacterial cytoplasm during phage infection. It is thus unlikely for G8P to exert anti-CRISPR function at the early stage of phage infection. Instead, G8P could interact with CRISPR-Cas in bacterial cytoplasm after the phage genome is translated. This post-translational inhibitory activity will require G8P-coding DNA to evade CRISPR attack during phage infection. In addition, the SpyCas9-inactivating G8P<sub>PD</sub> discovered in the present study are encoded by phages that infect *Escherichia coli* and *Pseudomonas aeruginosa*, which do not harbor type II CRISPR-Cas system. Horizontal gene transfer could explain for the cross-species CRISPR inactivation [26, 32], however a systemic phylogenetic analysis is necessary to reveal the evolutionary implications of the anti-CRISPR activity of G8Ps.



Despite the elusive biological relevance of the anti-CRISPR activity of G8P, we nevertheless demonstrated that the genome-editing activity of SpyCas9 in human cells can be modulated by G8P<sub>PD</sub>. To the best of our knowledge, our discovery represents the first peptides known to exhibit Cas9-inhibiting activity and expands the anti-CRISPR agent toolbox which is currently composed of anti-CRISPR proteins [21], small-molecules [20] and synthetic oligonucleotides [59]. Compared with Acr proteins that are typically 10 to 20 kD in size, G8P<sub>PD</sub> peptides are small in size and can be chemically synthesized in large scale. The facile manufacturing process is critical for the rapid evaluation of the structure-activity relationship to identify enhanced anti-CRISPR peptides. The varied Cas9-inhibiting activities observed among different inoviridae phage G8P<sub>PD</sub> supports the notion of improving SpyCas9-inhibiting peptides by sequence optimization.

G8P<sub>PD</sub> does not alter the pattern of SpyCas9-induced mutations, suggesting that G8P<sub>PD</sub>-mediated Cas9 inactivation does not interfere with the downstream DNA repair pathway. This feature facilitates the therapeutic applications of G8P<sub>PD</sub> as CRISPR-Cas off-switches by restricting the alterations of genome-editing outcome. It has been proposed that the specificity of SpyCas9 in human cells may be increased by partial inhibition with weak CRISPR-Cas inhibitors [20]. In the current study, we found that transfection of strong CRISPR-Cas inhibitor AcrII4A inhibited SpyCas9 activity to near complete in human cells when transfected prior to (Fig. 5a) or simultaneously with (Fig. 6a) sgRNA- and SpyCas9-coding plasmids. By contrast, co-transfection of G8P with CRISPR-Cas9 showed little inhibition of the on-target activity but reduced the off-

target events at *AAVS1* site. Interestingly, it was observed that the AcrIIC3, a weak inhibitor to SpyCas9 (Fig. 5a), did not increase the specificity of SpyCas9 in human cells (Fig. 6b-c). This result along with the results of G8P<sub>PD</sub> suggest that the mechanism of actions of the inhibitors may be also important for their effects on the specificity of CRISPR-Cas9. It has to be noted, however, that the applicability of G8Ps as agents to improve the specificity of CRISPR-Cas9 requires further investigation on additional cell types, genomic loci or genome-wide mutation profile.

## Conclusion

In the present study, we report the surprising discovery of phage-derived peptides that can inhibit the *in vitro* and *in vivo* activities of SpyCas9. These peptides inhibited Cas9 activity by disrupting Cas9 and sgRNA binding in an allosteric manner. We show that the genome-editing activity of CRISPR-Cas9 can be harnessed by G8P. This unique mechanism of action of G8P may provide insights into developing anti-CRISPR agents towards genome- or base-editing systems.

## Methods

### Production of M13 bacteriophage

To produce M13 phage, XL1-Blue *E. coli* was inoculated in SB medium supplemented with 2% glucose and grown until OD<sub>600</sub> reached 0.5. M13 phages were transfected and incubated with XL1-Blue *E. coli* at 37 °C for 30 min and the culture was shaken at 37 °C for 1 h. Thereafter, bacteria were centrifuged twice at 3,000 rpm for 15 min at 4 °C and washed with SB medium to remove glucose and free phage particles. The cells were re-suspended with SB medium and diluted to an OD<sub>600</sub> of 0.8 in 200 mL culture and grown at 30 °C overnight with shaking. The next day, the culture was centrifuged at 5,000 rpm for 15 min at 4 °C and the supernatant containing phage particles was collected. The supernatant was gently mixed with NaCl-PEG buffer containing 20% PEG and 2.5 M NaCl and kept on ice for 1 h. The PEG-phage supernatant was centrifuged at 9,000 rpm for 30 min at 4 °C. The supernatant was discarded and phage pellet was centrifuged again at 9,000 rpm for 5 min at 4 °C to remove residual medium. The precipitated phage particle was re-suspended in phosphate buffered saline (PBS) for further studies.

### Cell culture

HEK293T cells were maintained in Dulbecco's Modified Eagle's medium (DMEM, Gibco/Thermo Fisher Scientific, Shanghai, China) supplemented with 10% fetal bovine serum (FBS, Gibco/Thermo Fisher Scientific) at 5% CO<sub>2</sub> and 37 °C in a fully humidified incubator and were passaged when 70-90% confluency was reached. K562 cells were cultured in RPMI-1640 medium supplemented with 10% FBS, 100 IU/mL

of penicillin and 100  $\mu\text{g}/\text{mL}$  of streptomycin at 37  $^{\circ}\text{C}$  under 5%  $\text{CO}_2$ . Cell lines were validated by VivaCell Biosciences (Shanghai, China).

### **Expression and purification of SpyCas9 proteins**

pET28b plasmids coding SpyCas9 WT, K1158 mutant and K1176 mutant proteins were transformed into *E. coli* BL21 (DE3) cells. Single colonies were picked and grown in 2 liter LB media supplemented with 50  $\mu\text{g}/\text{mL}$  kanamycin. Culture was grown to an  $\text{OD}_{600}$  of 0.8. Protein expression was induced with 0.2 mM isopropyl- $\beta$ -D-thiogalactopyranoside (IPTG) at 16  $^{\circ}\text{C}$  overnight. Cells from 2 liter culture were pelleted by centrifugation at 6,000 g at 4  $^{\circ}\text{C}$  for 15 min and then re-suspended in 40 mL binding buffer containing 20 mM TrisHCl, pH 8.0 and 0.5 M NaCl. Cell suspension was then supplemented with 1 mM Tris (2-carboxyethyl) phosphine (TCEP) and 1 $\times$  complete inhibitor cocktail (Roche). Cells were lysed by sonication on ice and then centrifuged at 80,000 g at 4  $^{\circ}\text{C}$  for 30 min. The supernatant of cell lysate was incubated with 1 mL Ni-NTA agarose beads (QIAGEN) at 4  $^{\circ}\text{C}$  for 1 h. The resin was washed with 20 mL wash buffer that was made by supplementing binding buffer with 30 mM imidazole. Proteins were eluted with 5 mL elute buffer that was made by supplementing binding buffer with 300 mM imidazole. Eluted protein samples were further purified by gel filtration using Superose 6 10/300 column (GE Healthcare). These proteins were buffer-exchanged to storage buffer containing 20 mM HEPES, pH 8.0 and 200 mM NaCl, aliquoted and stored at -80  $^{\circ}\text{C}$ .

### **Construction of G8P<sub>PD</sub> overexpression plasmids**

Human codon-optimized DNA sequences encoding M13, f1, f1 mutant 2 and pf1 G8P<sub>PD</sub> were cloned into the BamHI/XbaI sites of pcDNA3.1(+) by plasmid recombination kit Clone Express (Vazyme). These G8P<sub>PD</sub> peptides carry an N-terminal SV40 nuclear localization signal (NLS) for co-localization with Cas9 proteins. G8P<sub>PD</sub> peptides were cloned into pIv-EF1 $\alpha$ -mCherry plasmid harboring mCherry fluorescent protein marker. sgRNA was cloned into pGL3-U6-gRNA plasmid carrying green fluorescent protein (GFP).

### ***In vitro* transcription of sgRNA**

sgRNA was transcribed from a sgRNA-coding PCR product with a 5' T7 promoter sequence using HiScribe T7 Quick High yield RNA Synthesis kit (NEB). The transcription was performed at 37 °C overnight and then purified by phenol: chloroform extraction, followed by ethanol precipitation. Purified sgRNA was quantified by spectrometry and stored at -80 °C.

### ***In vitro* cleavage assay**

Cas9 protein and transcribed sgRNA were incubated for 10 min at room temperature in reaction buffer containing 1 $\times$  NEB buffer 3.1 (NEB Biolabs) supplemented with 1 mM DTT) to form Cas9-sgRNA RNP complex. Cleavage was performed in 10  $\mu$ L reactions containing 100 ng of substrate DNA and 1  $\mu$ L RNP complex of indicated concentrations at room temperature for 1 h. Reactions were terminated by addition of 1 $\times$  DNA loading

buffer and resolved on 2% agarose gels. For inhibition experiments, G8P<sub>PD</sub> peptides were dissolved in deionized distilled water and incubated with Cas9 protein or pre-assembled Cas9-sgRNA RNP for 10 min at room temperature and the mixed solution was then added to the *in vitro* cleavage reaction. For experiments comparing the inhibitory activities of G8P<sub>PD</sub> peptides, 0.1% dimethyl sulfoxide (DMSO) was included in the reaction solution to solubilize lyophilized peptide samples.

### **Electrophoresis mobility shift assay (EMSA)**

sgRNA concentration is fixed to 15  $\mu$ M and Cas9 protein was titrated with a molar ratio of Cas9 over sgRNA ranging from 0.05 to 1. f1 G8P<sub>PD</sub> of 150, 300 and 600  $\mu$ M was incubated with Cas9 protein or pre-assembled Cas9-sgRNA RNP complex for 20 min at 25 °C and quenched by addition of 1 $\times$  native DNA loading buffer containing 40 mM Tris, pH 8.2, 40 mM acetate, 1 mM ethylenediaminetetraacetic acid (EDTA), 12.5% (v/v) glycerol, 0.025% (m/v) bromophenol blue. The samples were run on 2% agarose gels. For the order-of-addition experiment, Cas9 and sgRNA concentrations are fixed to 7.5 and 15  $\mu$ M respectively. SpyCas9 was pre-incubated with sgRNA or G8P<sub>PD</sub> for 20 min, followed by incubation with the counterpart for 20 min at 25 °C.

### **Chemical crosslinking and mass spectrometry**

Cas9 protein and M13 G8P<sub>PD</sub> were crosslinked using collision-induced dissociation (CID)-cleavable cross-linker-disuccinimido sulfoxide (DSSO) following the described procedure [54] with minor modification. Cas9 protein and peptides were mixed in PBS

and incubated for 30 min at room temperature. Crosslinking was performed for 30 min by adding DSSO (Thermo Scientific) to protein/peptide solution with 1,000 molar excess. The crosslinking reaction was quenched by excess Tris and the crosslinked products were digested with Chymotrypsin. The LC MSn data of digested peptides were collected on Orbitrap Fusion Tribrid (Thermo Scientific) with an on-line NanoLC system and analyzed using CID-MS<sup>2</sup>-MS<sup>3</sup> strategy as previously described [60]. Monoisotopic mass of parent ions and corresponding fragment ions, parent ion charge states and ion intensities from LC MS<sup>2</sup> and LC MS<sup>3</sup> spectra were extracted using Xcalibur v 3.0 (Thermo Scientific). Database searching was performed using Proteome Discoverer v 2.2 software (Thermo Scientific). Chymotrypsin was set as the enzyme with two missed cleavages being allowed as the maximum values. Protein N-terminal acetylation, methionine oxidation (15.995 Da), carbamidomethyl cysteine (57.021 Da), hydrolyzed lysine DSSO (176.014 Da) and lysine DSSO TRIS (279.078 Da) were selected as variable modifications. In addition, to account for the residual crosslinker three defined modifications on uncleaved lysines were chosen including alkene (C<sub>3</sub>H<sub>2</sub>O, 54 Da), sulfenic acid (C<sub>3</sub>H<sub>4</sub>O<sub>2</sub>S, 104 Da) and thiol (C<sub>3</sub>H<sub>2</sub>SO, 86 Da) modifications. A false discovery rate (FDR) of 1% was employed to filter out false positive results. The MS, MS<sup>2</sup> and MS<sup>3</sup> mass tolerances were set as 10 ppm, 20 ppm and 0.6 Da respectively.

The XlinkX detect program (Thermo Scientific) was used to search MS<sup>2</sup> data and identify the list of putative DSSO-interlinked products based on their unique DSSO fragmentation patterns. Monoisotopic masses and charges of parent ions measured in MS<sup>3</sup> scans for those putative cross-linked peptides were further validated and scored by

XlinkX. The final results were confirmed by manual inspection of the MS<sup>2</sup> and MS<sup>3</sup> spectra, respectively.

### **Circular dichroism**

Circular dichroism spectroscopy (Chirascan-plus CD spectrometer, Applied Photophysics) was used to probe the peptide conformational changes. 100  $\mu$ M WT and mutant 2 G8P<sub>PD</sub> peptides were dissolved in deionized water. The CD data were recorded at 25 °C and the average value of three biological replicates was presented.

### **Inhibition of CRISPR-Cas9 activity in human cells by G8P<sub>PD</sub> overexpression**

K562 cells ( $2 \times 10^5$ ) were harvested, washed with PBS and re-suspended in 20  $\mu$ L of SF nucleofection buffer (Lonza). G8P<sub>PD</sub>-coding plasmid (1  $\mu$ g) was mixed with re-suspended K562 cells and nucleofected by Lonza 4D nucleofector with program FF-120. Immediately following the nucleofection, 100  $\mu$ L pre-warmed RPMI-1640 medium was added into nucleofection cuvettes and the cells were transferred to culture dishes. At 24 post nucleofection, plasmids encoding SpyCas9 (500 ng) and *AAVS1* or *EMX1*-targeting sgRNA (250 ng) (Additional file 2: Table S1) were transfected into G8P<sub>PD</sub>-expressing K562 cells by nucleofection as described above.

Low-passage HEK293T cells were seeded into 24-well plates at a density of 150,000 cells per well. The next day, G8P<sub>PD</sub> plasmid (1  $\mu$ g) were transfected into cells using Lipofectamine 3000 (Invitrogen). At 24 h post G8P<sub>PD</sub> transfection, plasmids encoding SpyCas9 (0.5  $\mu$ g) and *AAVS1*-targeting sgRNA (250 ng) were co-transfected



into G8P<sub>PD</sub>-expressing HEK293T cells. For co-transfection experiments, K562 and HeLa cells were nucleofected with 1 µg of G8P<sub>PD</sub> plasmid, 0.5 µg of SpyCas9 plasmid and 0.5 µg sgRNA plasmid.

At 48 h after transfection of SpyCas9 and sgRNA plasmids, mCherry and GFP dual positive cells were collected using a BD FACSAria III flow cytometer (BD Biosciences). At least 2,000 cells were collected for subsequent analyses. The genomic DNA of sorted cells was extracted using QuickExtract DNA Extraction Solution (Epicentre). Genomic PCR reaction was performed using 100 ng genomic DNA, corresponding primers (Additional file 2: Table S2), Phanta Max Super-fidelity DNA Polymerase (Vazyme) or KOD plus (Takara) using a touchdown cycling protocol (30 cycles of 98 °C for 10 s, 68-58 °C for 15 s and 68 °C for 60 s). The PCR products were digested by T7E1 enzyme (NEB), resolved on 2% agarose gel and then analyzed by densitometry measurements as described [61]. Three biological replicates were performed for each condition.

### **Next-generation sequencing of edited genomic sites**

Genomic DNA (100 ng) from *AAVS1*-edited K562 cells was subject to PCR reactions using stubbed primers (Additional file 2: Table S2). PCR products were purified using Gel Extraction Kit (OMEGA). A high-throughput library preparation kit (Hiseq3000 SBS&Cluster kit) was used to generate dual-indexed sequence. Two or three biological replicates were processed by Genergy Biotech (Shanghai, China) or Genewiz (Suzhou, Jiangsu, China) using Illumina HiSeq 3000 platform.

Next generation sequencing library preparations were constructed following the manufacturer's protocol (VAHTS Universal DNA Library Prep Kit, Illumina). For each sample, more than 50 ng purified PCR fragment was used for direct library preparation. The fragments were treated with End Prep Enzyme Mix for end repairing, 5' phosphorylation and dA-tailing in one reaction, followed by a T-A ligation to add adaptors to both ends. Size selection of adaptor-ligated DNA was then performed using VAHTSTM DNA Clean Beads. Each sample was then amplified by PCR for 8 cycles using P5 and P7 primers. Both P5 and P7 primers carry sequences that can anneal with flowcell to perform bridge PCR. In addition, P7 primer carries a six-base index allowing for multiplexing. The PCR products were cleaned up using VAHTSTM DNA Clean Beads, validated using an Agilent 2100 Bioanalyzer (Agilent Technologies, Palo Alto, CA, USA) and quantified by Qubit2.0 Fluorometer (Invitrogen, Carlsbad, CA, USA). Then libraries with different indexes were multiplexed and loaded on an Illumina HiSeq instrument according to manufacturer's instructions (Illumina, San Diego, CA, USA). Sequencing was carried out using a 2 x 150 paired-end (PE) configuration. Image analyses and base calling were conducted by the HiSeq Control Software (HCS) + OLB + GAPipeline-1.6 (Illumina) on the HiSeq instrument. Sequencing reads were obtained in the Fastq format.

Amplicons with less than 6 M read counts were excluded from the analyses. Short reads were aligned to the reference sequence by Bowtie2 [62] with the following parameters: -D 5 -R 3 -N 1 --gbar 1 --rdg 5,1 --rfg 5,1 --dovetail. Aligned reads were sorted by SAMtools [63] and INDEL and SNP calling was performed by mpileup [64]

with maximum read depth per sample equal to the total reads mapped. VarScan v2.4 [65] was used for the quality control of SNPs and INDELs in mpileup output with a minimum variant frequency of  $\geq 0.001$ , and a  $P$  value threshold of  $\leq 0.05$ . With the above settings, the following items were quantified including the proportions of reads with INDELs/SNPs at each position in the 20 bp target region, the proportions of INDEL with different insertion or deletion length, the proportions of INDEL reading frames ( $3N$ ,  $3N+1$  and  $3N+2$ ) and the proportions of reads harboring variants over the total number of aligned reads.

### **Statistical analyses**

Two or three biological replicates were performed for each experimental condition. Significant difference was analyzed using one-way ANOVA with Dunnett's multiple comparisons test unless otherwise noted.

## **Additional files**

**Additional file 1: Figure S1-S5.**

**Additional file 2: Table S1-S2.**

## **Abbreviations**

CRISPR: Clustered regularly-interspaced short palindromic repeats; Cas: CRISPR-associated protein; sgRNA: Single guide RNA; Acrs: Anti-CRISPR proteins; dsDNA: Double-stranded DNA; G8P<sub>PD</sub>: Periplasmic domain of the major coat protein G8P; G8P<sub>FL</sub>: Full-length major coat protein G8P; RNP: Ribonucleoprotein; EMSA: Electrophoresis mobility shift assay; MS: Mass spectrometry; CID: Collision-induced dissociation; DSSO: Disuccinimido sulfoxide; PI domain: PAM-interacting domain; CD: Circular dichroism

## **Acknowledgements**

We thank the Analytical Platform and High-Throughput Screening Platform at Shanghai Institute for Advanced Immunochemical Studies (SIAIS) at ShanghaiTech University for the support of mass spectrometry and flow cytometry experiments.

## **Author contributions**

P.M. and J.L. conceptualized study. P.M., J.L., Y.-R.C. and S.-J.W. designed the experiments and analyzed data. Y.-R.C. and S.-J.W. performed the *in vitro* and *in vivo* Cas9-inhibiting experiments. J.C. analyzed next-generation sequencing data. J.Li

manufactured M13 phage and initial phage selections. P.M. and S.W performed the crosslink experimenting. W.C. and W.Z. performed MS experiment and analyzed the data. B.M. and B.Y. provided purified WT SpyCas9 proteins and advice on the purification of other SpyCas9 variants. S.W. and Z.Z. helped to express and purify SpyCas9 proteins. B.J. and G.Y. provided critical resources. P.M. and J.L. wrote the manuscript. All authors discussed the results and commented on and approved the manuscript.

### **Funding**

This work is supported by the National Natural Science Foundation of China (31600686 to J.L. and 31500632 to P.M.) and ShanghaiTech University Startup Fund (2019F0301-000-01 to J.L.).

### **Availability of data and materials**

The mass spectrometry data have been deposited into ProteomeXchange with the accession number PXD012466. Deep sequencing data have been deposited into NCBI SRA database with the accession number SRP180801. Additional data that support the findings of this study are available upon request from the lead contact author J. Liu.

### **Ethics approval and consent to participate**

Not applicable.

### **Consent for publication**

Not applicable.

### **Competing interests**

ShanghaiTech University has filed a patent application including the work described herein.

### **Author details**

<sup>1</sup>Shanghai Institute for Advanced Immunochemical Studies, ShanghaiTech University, Shanghai, 201210, China.

<sup>2</sup>College of Life Sciences, Zhejiang University, Hangzhou, Zhejiang, 310058, China.

<sup>3</sup>School of Pharmacy, Key Laboratory of Molecular Pharmacology and Drug Evaluation (Yantai University), Ministry of Education, Collaborative Innovation Center of Advanced Drug Delivery System and Biotech Drugs in Universities of Shandong, Yantai University, 264005, Yantai, Shandong, People's Republic of China.

<sup>4</sup>University of Chinese Academy of Sciences, Beijing, China.

<sup>5</sup> These authors contributed equally to this work.

## References

1. Barrangou R, Fremaux C, Deveau H, Richards M, Boyaval P, Moineau S, et al. CRISPR provides acquired resistance against viruses in prokaryotes. *Science*. 2007;315:1709-1712.
2. Brouns SJ, Jore MM, Lundgren M, Westra ER, Slijkhuis RJ, Snijders AP, et al. Small CRISPR RNAs guide antiviral defense in prokaryotes. *Science*. 2008;321:960-964.
3. Marraffini LA, Sontheimer EJ. CRISPR interference limits horizontal gene transfer in staphylococci by targeting DNA. *Science*. 2008;322:1843-1845.
4. Jinek M, Chylinski K, Fonfara I, Hauer M, Doudna JA, Charpentier E. A programmable dual-RNA-guided DNA endonuclease in adaptive bacterial immunity. *Science*. 2012;337:816-821.
5. Jinek M, East A, Cheng A, Lin S, Ma E, Doudna J. RNA-programmed genome editing in human cells. *Elife*. 2013;2:e00471.
6. Mali P, Yang L, Esvelt KM, Aach J, Guell M, DiCarlo JE, et al. RNA-guided human genome engineering via Cas9. *Science*. 2013;339:823-826.
7. Cong L, Ran FA, Cox D, Lin S, Barretto R, Habib N, et al. Multiplex genome engineering using CRISPR/Cas systems. *Science*. 2013;339:819-823.
8. Cho SW, Kim S, Kim JM, Kim JS. Targeted genome engineering in human cells with the Cas9 RNA-guided endonuclease. *Nat Biotechnol*. 2013;31:230-232.
9. Koo T, Lee J, Kim JS. Measuring and reducing off-target activities of programmable nucleases including CRISPR-Cas9. *Mol Cells*. 2015;38:475-481.
10. Kosicki M, Tomberg K, Bradley A. Repair of double-strand breaks induced by CRISPR-Cas9 leads to large deletions and complex rearrangements. *Nat Biotechnol*. 2018;36:765-771.
11. Li C, Psatha N, Gil S, Wang H, Papayannopoulou T, Lieber A. HDAd5/35(++) adenovirus vector expressing anti-CRISPR peptides decreases CRISPR/Cas9 toxicity in human hematopoietic stem cells. *Mol Ther Methods Clin Dev*. 2018;9:390-401.
12. Hsu PD, Scott DA, Weinstein JA, Ran FA, Konermann S, Agarwala V, et al. DNA targeting specificity of RNA-guided Cas9 nucleases. *Nat Biotechnol*. 2013;31:827-832.
13. Pattanayak V, Lin S, Guilinger JP, Ma E, Doudna JA, Liu DR. High-throughput profiling of off-target DNA cleavage reveals RNA-programmed Cas9 nuclease

- specificity. *Nat Biotechnol.* 2013;31:839-843.
14. Fu Y, Sander JD, Reyon D, Cascio VM, Joung JK. Improving CRISPR-Cas nuclease specificity using truncated guide RNAs. *Nat Biotechnol.* 2014;32:279-284.
  15. Fellmann C, Gowen BG, Lin PC, Doudna JA, Corn JE. Cornerstones of CRISPR-Cas in drug discovery and therapy. *Nat Rev Drug Discov.* 2017;16:89-100.
  16. Cao J, Wu L, Zhang SM, Lu M, Cheung WK, Cai W, et al. An easy and efficient inducible CRISPR/Cas9 platform with improved specificity for multiple gene targeting. *Nucleic Acids Res.* 2016;44:e149.
  17. Nihongaki Y, Kawano F, Nakajima T, Sato M. Photoactivatable CRISPR-Cas9 for optogenetic genome editing. *Nat Biotechnol.* 2015;33:755-760.
  18. Nunez JK, Harrington LB, Doudna JA. Chemical and biophysical modulation of Cas9 for tunable genome engineering. *ACS Chem Biol.* 2016;11:681-688.
  19. Wright AV, Sternberg SH, Taylor DW, Staahl BT, Bardales JA, Kornfeld JE, et al. Rational design of a split-Cas9 enzyme complex. *Proc Natl Acad Sci U S A.* 2015;112:2984-2989.
  20. Maji B, Gangopadhyay SA, Lee M, Shi M, Wu P, Heler R, et al. A high-throughput platform to identify small-molecule inhibitors of CRISPR-Cas9. *Cell.* 2019;177:1067-1079.
  21. Pawluk A, Davidson AR, Maxwell KL. Anti-CRISPR: discovery, mechanism and function. *Nat Rev Microbiol.* 2018;16:12-17.
  22. Stanley SY, Maxwell KL. Phage-encoded anti-CRISPR defenses. *Annu Rev Genet.* 2018;52:445-464.
  23. Bondy-Denomy J, Pawluk A, Maxwell KL, Davidson AR. Bacteriophage genes that inactivate the CRISPR/Cas bacterial immune system. *Nature.* 2013;493:429-432.
  24. Bondy-Denomy J, Davidson AR, Doudna JA, Fineran PC, Maxwell KL, Moineau S, et al. A unified resource for tracking anti-CRISPR names The CRISPR Journal. 2019;1:304-305.
  25. Pawluk A, Bondy-Denomy J, Cheung VH, Maxwell KL, Davidson AR. A new group of phage anti-CRISPR genes inhibits the type I-E CRISPR-Cas system of *Pseudomonas aeruginosa*. *MBio.* 2014;5:e00896.
  26. Pawluk A, Staals RH, Taylor C, Watson BN, Saha S, Fineran PC, et al.



- Inactivation of CRISPR-Cas systems by anti-CRISPR proteins in diverse bacterial species. *Nat Microbiol.* 2016;1:16085.
27. He F, Bhoobalan-Chitty Y, Van LB, Kjeldsen AL, Dedola M, Makarova KS, et al. Anti-CRISPR proteins encoded by archaeal lytic viruses inhibit subtype I-D immunity. *Nat Microbiol.* 2018;3:461-469.
  28. Marino ND, Zhang JY, Borges AL, Sousa AA, Leon LM, Rauch BJ, et al. Discovery of widespread type I and type V CRISPR-Cas inhibitors. *Science.* 2018;362:240-242.
  29. Pawluk A, Amrani N, Zhang Y, Garcia B, Hidalgo-Reyes Y, Lee J, et al. Naturally occurring off-switches for CRISPR-Cas9. *Cell.* 2016;167:1829-1838 e1829.
  30. Hynes AP, Rousseau GM, Lemay ML, Horvath P, Romero DA, Fremaux C, et al. An anti-CRISPR from a virulent streptococcal phage inhibits *Streptococcus pyogenes* Cas9. *Nat Microbiol.* 2017;2:1374-1380.
  31. Rauch BJ, Silvis MR, Hultquist JF, Waters CS, McGregor MJ, Krogan NJ, et al. Inhibition of CRISPR-Cas9 with bacteriophage proteins. *Cell.* 2017;168:150-158 e110.
  32. Uribe RV, van der Helm E, Misiakou MA, Lee SW, Kol S, Sommer MOA. Discovery and characterization of Cas9 inhibitors disseminated across seven bacterial phyla. *Cell Host Microbe.* 2019;25:233-241 e235.
  33. Watters KE, Fellmann C, Bai HB, Ren SM, Doudna JA. Systematic discovery of natural CRISPR-Cas12a inhibitors. *Science.* 2018;362:236-239.
  34. Lee J, Mir A, Edraki A, Garcia B, Amrani N, Lou HE, et al. Potent Cas9 inhibition in bacterial and human cells by AcrIIC4 and AcrIIC5 anti-CRISPR proteins. *MBio.* 2018;9.
  35. Basgall EM, Goetting SC, Goeckel ME, Giersch RM, Roggenkamp E, Schrock MN, et al. Gene drive inhibition by the anti-CRISPR proteins AcrIIA2 and AcrIIA4 in *Saccharomyces cerevisiae*. *Microbiology.* 2018;164:464-474.
  36. Harrington LB, Doxzen KW, Ma E, Liu JJ, Knott GJ, Edraki A, et al. A broad-spectrum inhibitor of CRISPR-Cas9. *Cell.* 2017;170:1224-1233 e1215.
  37. Hynes AP, Rousseau GM, Agudelo D, Goulet A, Amigues B, Loehr J, et al. Widespread anti-CRISPR proteins in virulent bacteriophages inhibit a range of Cas9 proteins. *Nat Commun.* 2018;9:2919.
  38. Shin J, Jiang F, Liu JJ, Bray NL, Rauch BJ, Baik SH, et al. Disabling Cas9 by an anti-CRISPR DNA mimic. *Sci Adv.* 2017;3:e1701620.

39. Li J, Xu Z, Chupalov A, Marchisio MA. Anti-CRISPR-based biosensors in the yeast *S. cerevisiae*. *J Biol Eng*. 2018;12:11.
40. Nakamura M, Srinivasan P, Chavez M, Carter MA, Dominguez AA, La Russa M, et al. Anti-CRISPR-mediated control of gene editing and synthetic circuits in eukaryotic cells. *Nat Commun*. 2019;10:194.
41. Jiang F, Liu JJ, Osuna BA, Xu M, Berry JD, Rauch BJ, et al. Temperature-responsive competitive inhibition of CRISPR-Cas9. *Mol Cell*. 2019;73:601-610 e605.
42. Bubeck F, Hoffmann MD, Harteveld Z, Aschenbrenner S, Bietz A, Waldhauer MC, et al. Engineered anti-CRISPR proteins for optogenetic control of CRISPR-Cas9. *Nat Methods*. 2018;15:924-927.
43. Hoffmann MD, Aschenbrenner S, Grosse S, Rapti K, Domenger C, Fakhiri J, et al. Cell-specific CRISPR-Cas9 activation by microRNA-dependent expression of anti-CRISPR proteins. *Nucleic Acids Res*. 2019.
44. Palmer DJ, Turner DL, Ng P. Production of CRISPR/Cas9-mediated self-cleaving helper-dependent adenoviruses. *Mol Ther Methods Clin Dev*. 2019;13:432-439.
45. Dong, Guo M, Wang S, Zhu Y, Xiong Z, Yang J, et al. Structural basis of CRISPR-SpyCas9 inhibition by an anti-CRISPR protein. *Nature*. 2017;546:436-439.
46. Yang H, Patel DJ. Inhibition Mechanism of an Anti-CRISPR Suppressor AcrIIA4 Targeting SpyCas9. *Mol Cell*. 2017;67:117-127 e115.
47. Wang X, Yao D, Xu JG, Li AR, Xu J, Fu P, et al. Structural basis of Cas3 inhibition by the bacteriophage protein AcrF3. *Nat Struct Mol Biol*. 2016;23:868-870.
48. Wang J, Ma J, Cheng Z, Meng X, You L, Wang M, et al. A CRISPR evolutionary arms race: structural insights into viral anti-CRISPR/Cas responses. *Cell Res*. 2016;26:1165-1168.
49. Dong L, Guan X, Li N, Zhang F, Zhu Y, Ren K, et al. An anti-CRISPR protein disables type V Cas12a by acetylation. *Nat Struct Mol Biol*. 2019;26:308-314.
50. Smith GP, Petrenko VA. Phage Display. *Chem Rev*. 1997;97:391-410.
51. van Wezenbeek PM, Hulsebos TJ, Schoenmakers JG. Nucleotide sequence of the filamentous bacteriophage M13 DNA genome: comparison with phage fd. *Gene*. 1980;11:129-148.

52. Marvin DA. Filamentous phage structure, infection and assembly. *Curr Opin Struct Biol.* 1998;8:150-158.
53. Morag O, Sgourakis NG, Baker D, Goldbourn A. The NMR-Rosetta capsid model of M13 bacteriophage reveals a quadrupled hydrophobic packing epitope. *Proc Natl Acad Sci U S A.* 2015;112:971-976.
54. Kao A, Chiu CL, Vellucci D, Yang Y, Patel VR, Guan S, et al. Development of a novel cross-linking strategy for fast and accurate identification of cross-linked peptides of protein complexes. *Mol Cell Proteomics.* 2011;10:M110 002212.
55. Nishimasu H, Ran FA, Hsu PD, Konermann S, Shehata SI, Dohmae N, et al. Crystal structure of Cas9 in complex with guide RNA and target DNA. *Cell.* 2014;156:935-949.
56. Zhu Y, Gao A, Zhan Q, Wang Y, Feng H, Liu S, et al. Diverse mechanisms of CRISPR-Cas9 inhibition by type IIC anti-CRISPR proteins. *Mol Cell.* 2019;74:296-309 e297.
57. Bondy-Denomy J, Garcia B, Strum S, Du M, Rollins MF, Hidalgo-Reyes Y, et al. Multiple mechanisms for CRISPR-Cas inhibition by anti-CRISPR proteins. *Nature.* 2015;526:136-139.
58. Jinek M, Jiang F, Taylor DW, Sternberg SH, Kaya E, Ma E, et al. Structures of Cas9 endonucleases reveal RNA-mediated conformational activation. *Science.* 2014;343:1247997.
59. Li B, Zeng C, Li W, Zhang X, Luo X, Zhao W, et al. Synthetic oligonucleotides inhibit CRISPR-Cpf1-mediated genome editing. *Cell Rep.* 2018;25:3262-3272 e3263.
60. Liu F, Lossel P, Scheltema R, Viner R, Heck AJR. Optimized fragmentation schemes and data analysis strategies for proteome-wide cross-link identification. *Nat Commun.* 2017;8:15473.
61. Guschin DY, Waite AJ, Katibah GE, Miller JC, Holmes MC, Rebar EJ. A rapid and general assay for monitoring endogenous gene modification. *Methods Mol Biol.* 2010;649:247-256.
62. Langmead B, Salzberg SL. Fast gapped-read alignment with Bowtie 2. *Nat Methods.* 2012;9:357-359.
63. Li H, Handsaker B, Wysoker A, Fennell T, Ruan J, Homer N, et al. The sequence alignment/map format and SAMtools. *Bioinformatics.* 2009;25:2078-2079.
64. Li H, Durbin R. Fast and accurate short read alignment with Burrows-Wheeler transform. *Bioinformatics.* 2009;25:1754-1760.

65. Koboldt DC, Zhang Q, Larson DE, Shen D, McLellan MD, Lin L, et al. VarScan 2: somatic mutation and copy number alteration discovery in cancer by exome sequencing. *Genome Res.* 2012;22:568-576.

## Figures and legends

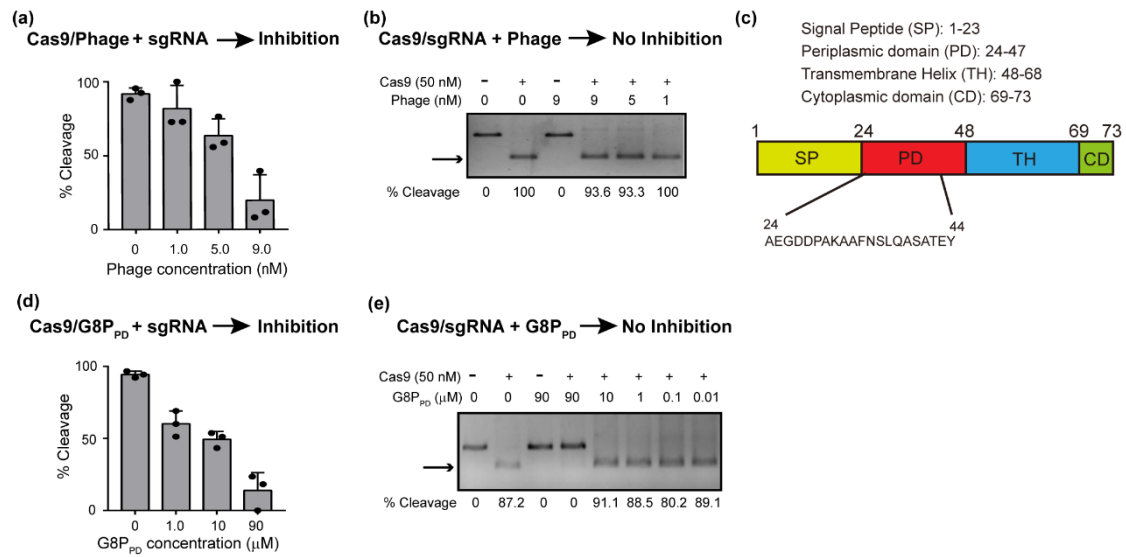

**Fig. 1** Inhibition of the *in vitro* activity of SpyCas9 by intact M13 phage and phage-derived G8P<sub>PD</sub> peptides. **(a)** Dose-dependent inhibition of SpyCas9 by intact M13 phage. **(b)** Intact M13 phage does not inhibit the *in vitro* activity of assembled Cas9-sgRNA RNP. **(c)** Structural organization of M13 phage major coat protein G8P. **(d)** Dose-dependent inhibition of SpyCas9 by **(e)** G8P<sub>PD</sub> does not inhibit the *in vitro* activity of assembled Cas9-sgRNA RNP. The above reactions are performed in the absence or presence of 50 nM SpyCas9 proteins. The results are shown as mean  $\pm$  SD ( $n = 3$ ). Arrows indicate cleavage products.

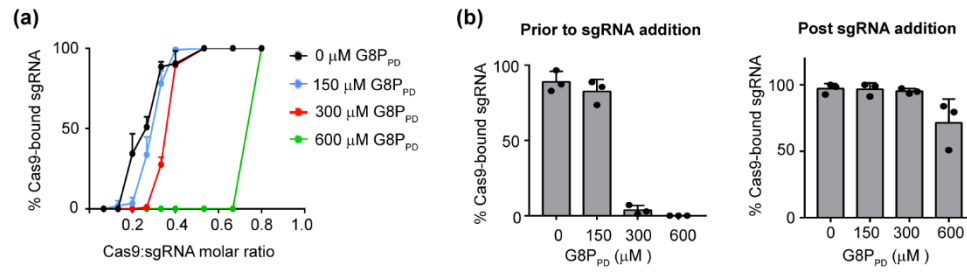

**Fig. 2** G8P<sub>PD</sub> prevents Cas9-sgRNA assembly. **(a)** Dose-dependent inhibition of Cas9-sgRNA binding by f1 G8P<sub>PD</sub>. sgRNA concentration is fixed to 15 μM. **(b)** f1 G8P<sub>PD</sub> prevents Cas9-sgRNA assembly prior to, but not post, sgRNA addition. Cas9 to sgRNA ratio is fixed to 0.3. The above results are shown as mean ± SD ( $n = 3$ ).

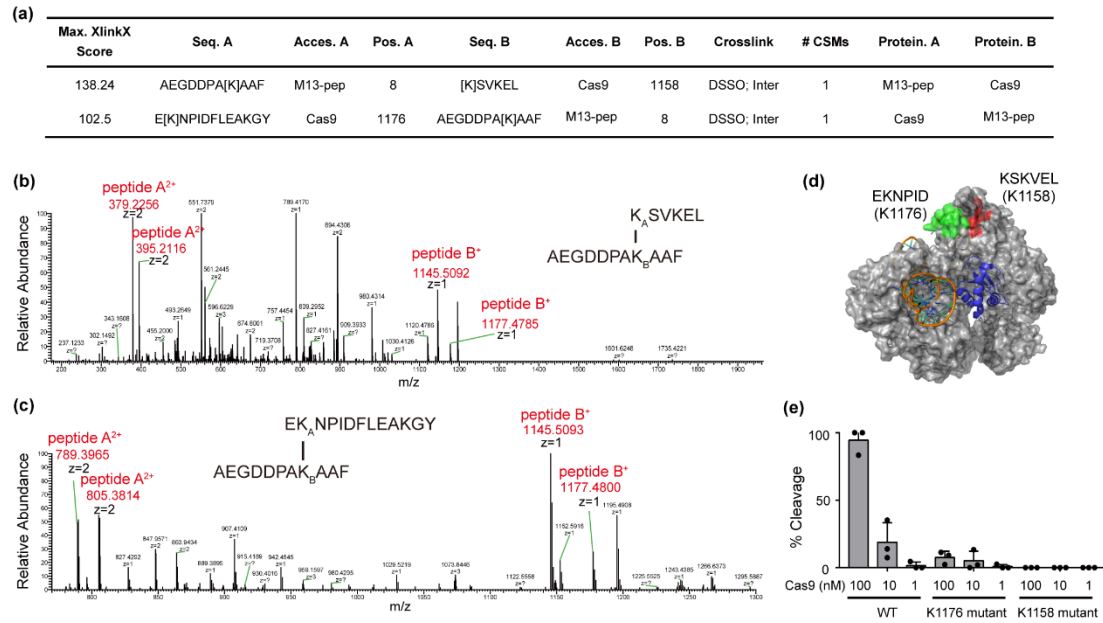

**Fig. 3** Identification of M13 G8P<sub>PD</sub> binding site in the PI domain of SpyCas9. (a) Maximum XlinkX scores of peptide hits in high-resolution MS analyses. (b) Secondary MS showing crosslinked peptides KSVKEL-AEGDDPAKAAF. (c) Secondary MS showing crosslinked peptides EKNPIDFLEAKGY-AEGDDPAKAAF. (d) Location of G8P<sub>PD</sub> binding sites in SpyCas9. The structure of SpyCas9 in complex with AcrIIA4 (5VW1) is displayed by PyMOL. AcrIIA4 is shown in blue. The candidate G8P<sub>PD</sub> binding sites on SpyCas9 are shown in green and red respectively. (e) *In vitro* DNA cleavage by WT, K1176 mutant and K1158 mutant SpyCas9. Arrow indicates cleavage product. The results are shown as mean  $\pm$  SD ( $n = 3$ ).

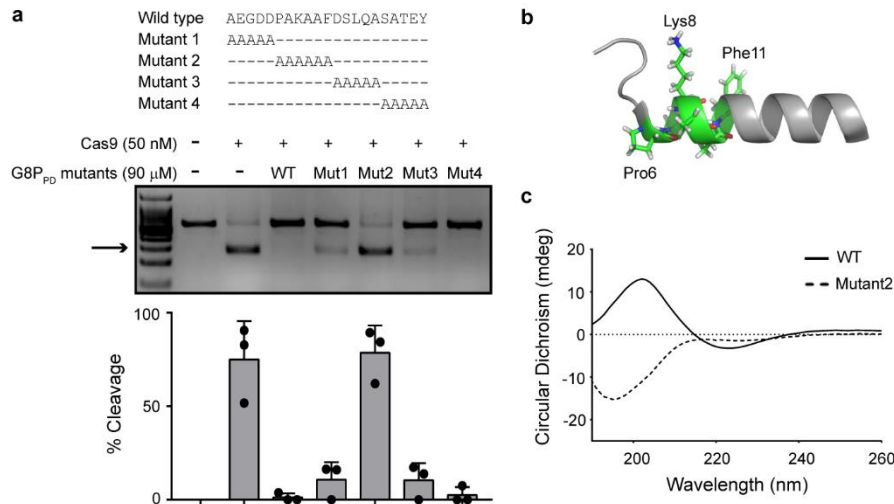

**Fig. 4**  $\alpha$ -helical structure is critical for the Cas9-inhibiting activity of G8P<sub>PD</sub>. **(a)** Alanine mutations at position 6-11 abolish the inhibitory activity of G8P<sub>PD</sub>. The results are shown as mean  $\pm$  SD ( $n = 3$ ). The arrow denotes cleavage products. **(b)** Structure of G8P<sub>PD</sub> peptide (PDB entry 2MJZ), displayed by PyMOL. Residues 6-11 are shown as stick. **(c)** CD spectra of f1 G8P<sub>PD</sub> WT and mutant 2.



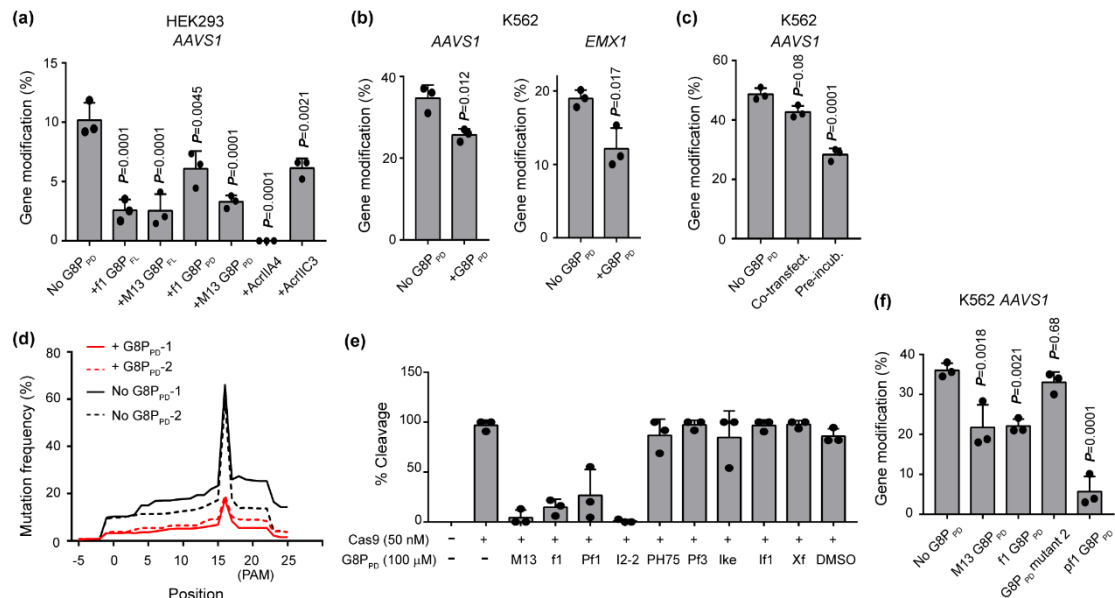

**Fig. 5** Inhibition of the genome-editing activity of SpyCas9 in human Cells by inoiviridae phage G8P<sub>PD</sub>. **(a)** Comparison of SpyCas9-inhibiting activities of phage peptides and Acrs in HEK293 cells. **(b)** G8P<sub>PD</sub> inhibits the genome-editing activity of SpyCas9 across different genes and cell types. **(c)** The effects of G8P<sub>PD</sub> co-transfection and pre-incubation on the genome-editing activity of CRISPR-Cas9. **(d)** Density plot showing the next-generation sequencing analyses of the distribution of mutation rates along the edited genomic sites of *AAVS1* in K562 cells. The results of two biological replicates are individually shown. **(e)** Inhibition of the *in vitro* DNA cleavage activity of SpyCas9 by inoiviridae G8P<sub>PD</sub>. DMSO of 0.1% is included as a solvent control. Arrow denotes cleavage products. **(f)** Inhibition of SpyCas9 activity in K562 cells by inoiviridae G8P<sub>PD</sub>. The results are shown as mean  $\pm$  SD ( $n = 3$ ). Significant difference between test groups and mock is determined by one-way ANOVA with Dunnett's multiple comparisons test. The adjusted  $P$  values are indicated.

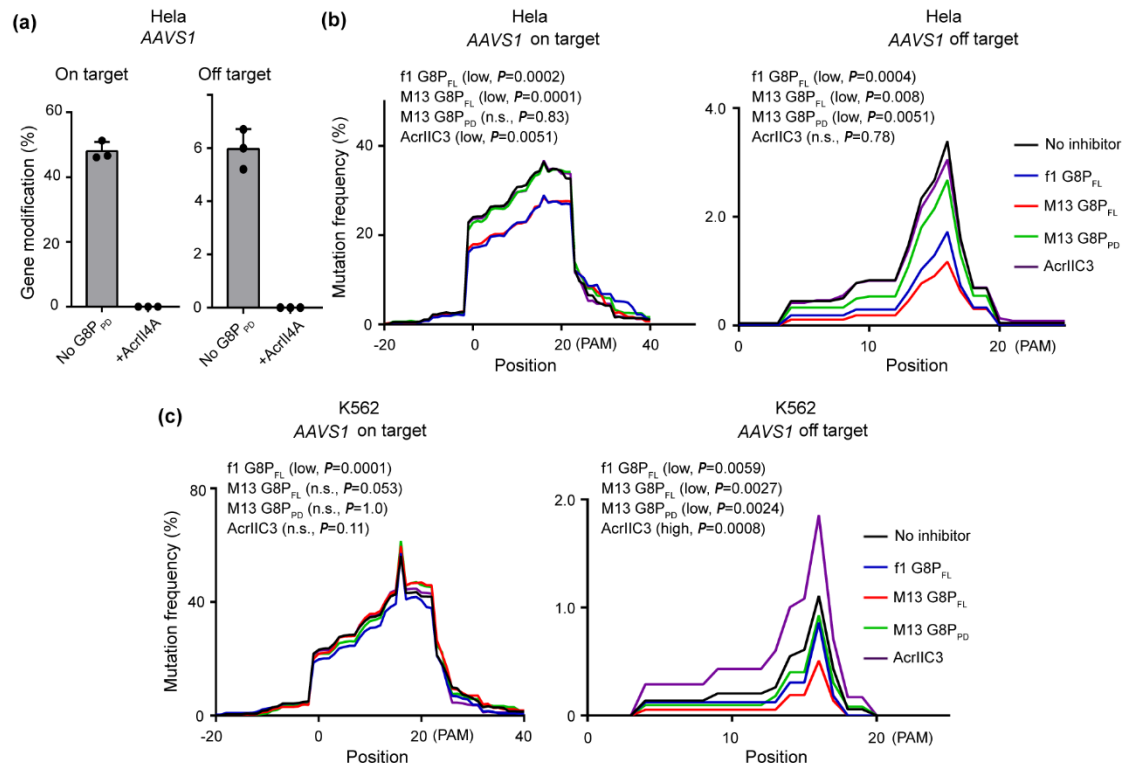

**Fig. 6** Analyses of the effects of co-transfected G8P and Acrs on the genome-editing activity of SpyCas9. **(a)** AcrII4A abolishes the on- and off-activities of SpyCas9, as determined by T7E1 assay. The results are shown as mean  $\pm$  SD ( $n = 3$ ). **(b-c)** Density plot showing the distribution of mutation rates along the gene-edited genomic sites of *AAVS1* in HeLa **(b)** and K562 **(c)** cells. The mean value of three biological replicates are displayed. Significant difference between test groups and mock is determined by one-way ANOVA with Dunnett's multiple comparisons test. Low and high indicates increased and decreased mutation rates, respectively. The adjusted  $P$  values are indicated.

## **Additional file 1: Figure S1-S5**

### **TABLE OF CONTENT**

1. **Figure S1** Comparison of M13 and f1 phage G8P<sub>PD</sub>.
2. **Figure S2** MS analyses of the interface between SpyCas9 and M13 G8P<sub>PD</sub>.
3. **Figure S3** Construction and purification of SpyCas9 K1158 and K1176 mutants.
4. **Figure S4** Profile of SpyCas9-induced mutations in the absence and presence of G8P<sub>PD</sub>.
5. **Figure S5** G8P<sub>PD</sub> Peptides Derived from Inoviridae Bacteriophages.

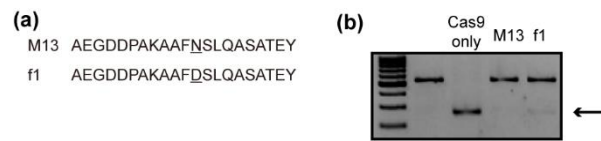

**Figure S1** Comparison of M13 and f1 phage G8P<sub>PD</sub>. **(a)** Sequence alignment of M13 and f1 G8P<sub>PD</sub>. **(b)** The *in vitro* Cas9-inhibiting activity of M13 and f1 G8P<sub>PD</sub>. M13 and f1 G8P<sub>PD</sub> of 100  $\mu$ M were incubated with 50 nM of Cas9 proteins prior to the addition of 50 nM of sgRNA.

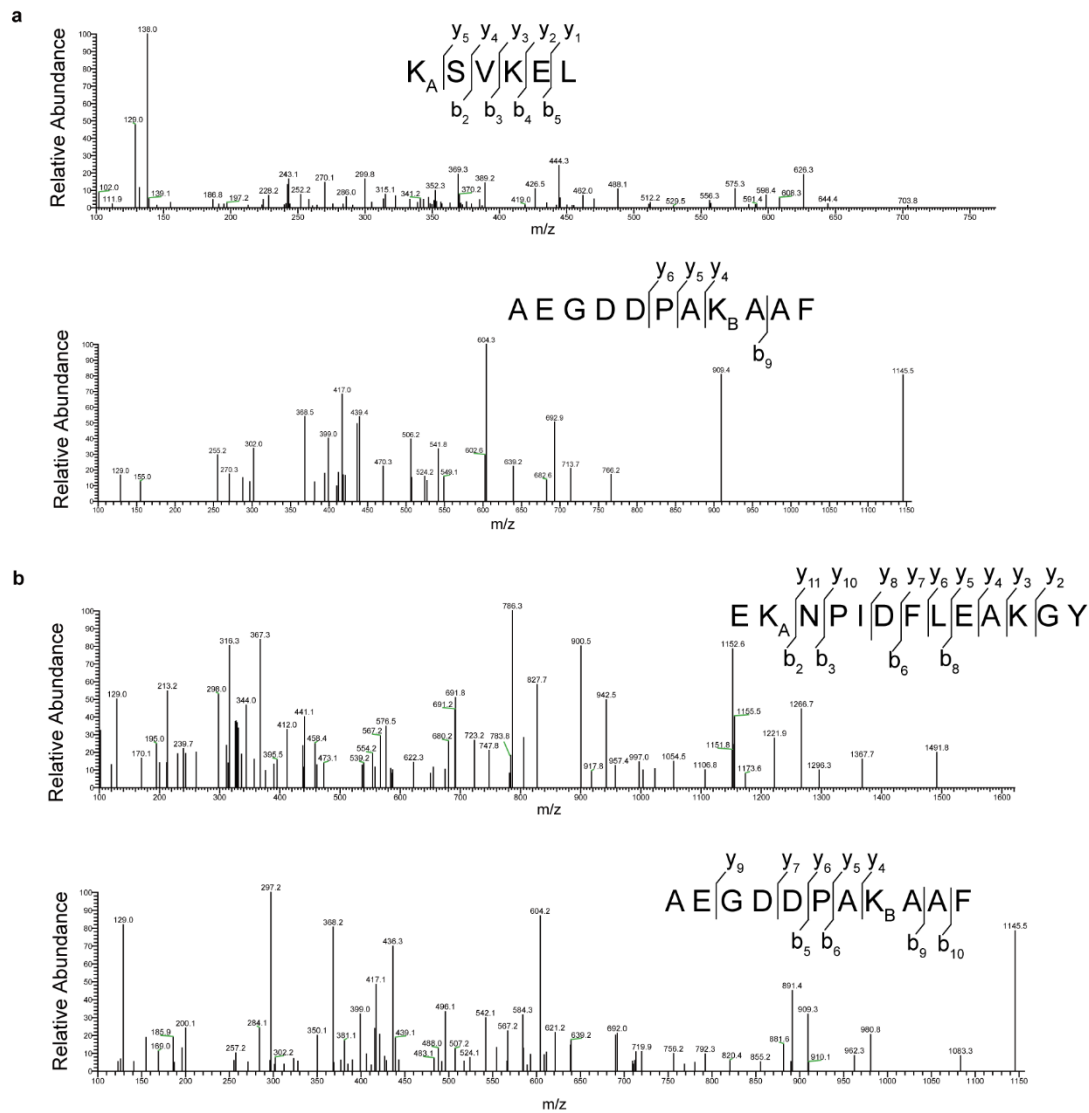

**Figure S2** MS analyses of the interface between SpyCas9 and M13 G8P<sub>PD</sub>. **(a)** Tertiary MS for individual peptides KSVKEL and AEGDDPAKAAF as described in Fig. 3b. **(b)** Tertiary MS for individual peptides ENKPIDFLEAKGY and AEGDDPAKAAF as described in Fig. 3c.

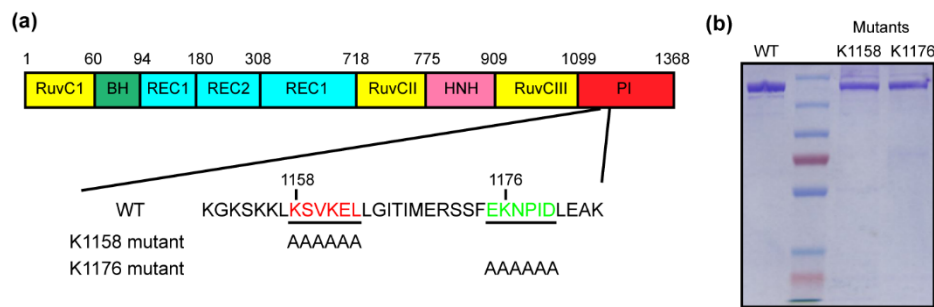

**Figure S3** Construction and purification of SpyCas9 K1158 and K1176 mutants. (a) Schematic presentation of the structural organization of *S. pyogenes* Cas9. BH, bridging helix. PI, PAM interacting domain. Positions of alanine mutations in K1158 and K1176 mutants are indicated. (b) Purified WT, K1158 mutant and K1176 mutant SpyCas9 proteins.

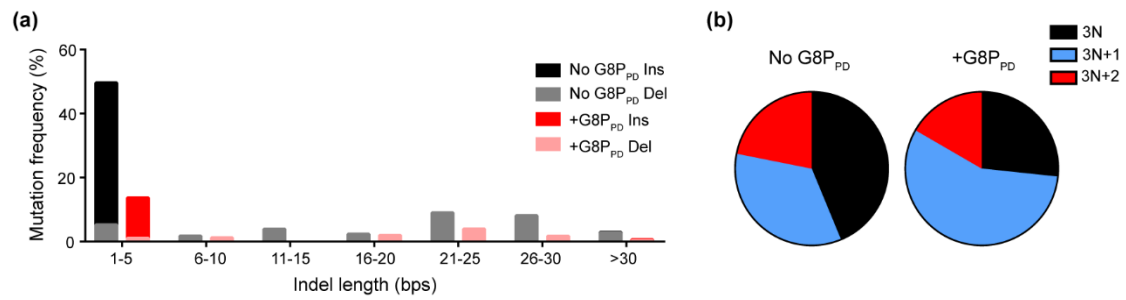

**Figure S4** Profile of SpyCas9-induced mutations in the absence and presence of G8P<sub>PD</sub>.

**(a)** Distribution of indel length. **(b)** Distribution of indel frame phase calculated as the length of indel modulus. The mean value of two biological replicates are shown.

| Organism                  | Uniprot ID | Bacteria Host                                          | Peptide Sequence              |
|---------------------------|------------|--------------------------------------------------------|-------------------------------|
| Enterobacteria phage M13  | P69541     | <i>Escherichia coli</i>                                | AEGDDPAKAAFNSLQASATEY         |
| Pseudomonas phage Pf1     | P03621     | <i>Pseudomonas aeruginosa</i>                          | ATSLPAFAGVIDTSAVESAITDGGQDMKA |
| Enterobacteria phage f1   | P69540     | <i>Escherichia coli</i>                                | AEGDDPAKAAFDLSLQASATEY        |
| Pseudomonas phage Pf3     | P03623     | <i>Pseudomonas aeruginosa</i>                          | MQSVITDVTGQLTAVQAD            |
| Enterobacteria phage IKe  | P03620     | <i>Escherichia coli</i>                                | AEPNAATNYATEAMDSLKTQAIDLI     |
| Enterobacteria phage If1  | P03619     | <i>Escherichia coli</i>                                | ADDATSQAKAAFDLSLTAQATEM       |
| Xanthomonas phage Xf      | P03622     | <i>Xanthomonas campestris</i><br>pv. <i>oryzae</i>     | SGVGDGVDVWSAIEGAAGP           |
| Thermus phage PH75        | P82889     | <i>Thermus thermophilus</i>                            | MDFNPSEVASQVTNYIQ             |
| Enterobacteria phage I2-2 | P15416     | <i>Escherichia coli</i>                                | ADDGTSTATSYATEAMNSLKTQATDLIDQ |
| Xanthomonas phage phiLf   | P68674     | <i>Xanthomonas campestris</i><br>pv. <i>campestris</i> | MGDILTVSGAE                   |

**Figure S5** G8P<sub>PD</sub> Peptides Derived from Inoviridae Bacteriophages.



## **Additional file 2: Table S1-S2**

### **TABLE OF CONTENT**

1. **Table S1.** sgRNA-targeted genomic sites in this study.
2. **Table S2.** Primer list.

**Table S1. sgRNA-targeted genomic sites in this study.**

| <b>Gene</b> | <b>Sequence</b>         |
|-------------|-------------------------|
| EMX1        | gagtccgagcagaagaagaaggg |
| AAVS1       | gggagggagagcttggcagg    |

**Table S2. Primer list.**

| <b>Name</b>   | <b>Use</b>                                            | <b>Sequence</b>                                            |
|---------------|-------------------------------------------------------|------------------------------------------------------------|
| CCR5-Ext-FWD  | Forward external primer for PCR cleavage template     | aggtgagaggattgcttg                                         |
| CCR5-Ext-REV  | Reverse external primer for PCR cleavage template     | aatgagagctgcaggtg                                          |
| CCR5-Int-FWD  | Forward internal primer for PCR cleavage template     | gagccaagctctccatctagt                                      |
| CCR5-Int-REV  | Reverse internal primer for PCR cleavage template     | gccctgtcaagattgacac                                        |
| AAVS1-NGS-FWD | NGS, Forward                                          | tcttcctacacgacgctctccgatctc<br>tggtgacacacccccattt         |
| AAVS1-NGS-REV | NGS, Reverse                                          | gtgactggagttcagacgtgtgctcttc<br>cgatctccaggatcagtgaaacgcac |
| AAVS1-Ext-FWD | Forward external primer for nested PCR for T7E1 assay | ggagtttccacacggacac                                        |
| AAVS1-Ext-REV | Reverse external primer for nested PCR for T7E1 assay | cccctatgtccacttcagga                                       |
| AAVS1-Int-FWD | Forward internal primer for nested PCR for T7E1 assay | tgcttctcctcttgggaagt                                       |
| AAVS1-Int-REV | Reverse internal primer for nested PCR for T7E1 assay | cggttaatgtggctctggtt                                       |
| EMX1-FWD      | Forward primer for T7E1 assay                         | ggagcagctggtcagagggg                                       |
| EMX1-REV      | Reverse primer for T7E1 assay                         | gggaagggggacactgggga                                       |
